# Supplementary material
Source: PubMed Central journal article supplement (PMC2785739)

**Supplementary Figure 1.** The N-terminal interaction of syntaxin-1A with Munc18-1 measured by ITC. Raw data (top panel) and integrated normalized ITC data (bottom panel) for binding of syntaxin-1A (2-243) to Munc18-1 WT (closed squares), F115E (open circles) and E132A (open triangles). Experiments were performed by injecting 3.1  $\mu$ L aliquots of 30  $\mu$ M syntaxin-1A (2-243) into 3  $\mu$ M Munc18-1 proteins at 298 K.

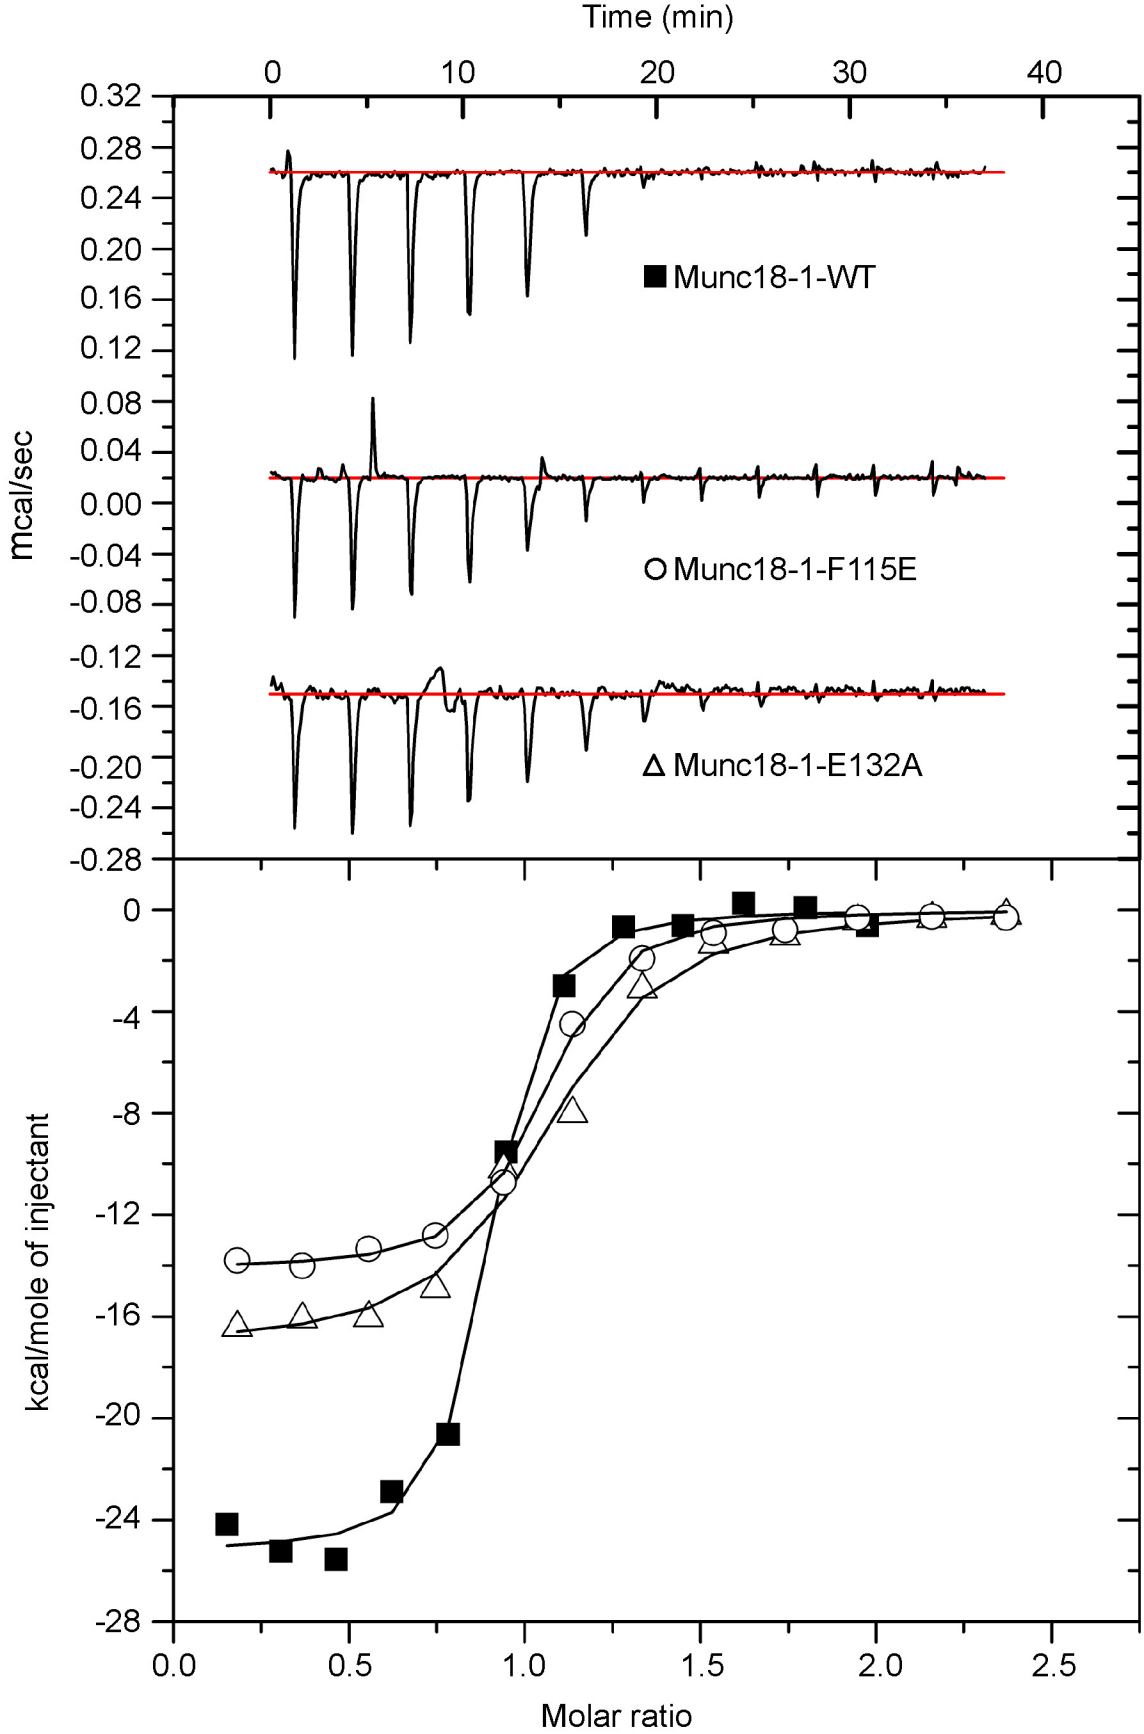

Supplement: E09-08-0712_1.pdf [file E09-08-0712_1.pdf]
